# Supplementary material
Source: HighWire-hosted journal article supplement (https://www.cmaj.ca/content/suppl/2017/02/03/cmaj.160542)
Supplement: 160542-vaccine-pain-graphic-CMAJ.pdf [file 160542-vaccine-pain-graphic-CMAJ.pdf]

# MINIMIZING INFANT VACCINE PAIN

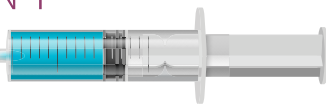

## Question

What is the relative effectiveness of additive pain interventions during vaccination in infants?

## Background

Vaccine injections → Acute pain & distress → Vaccine hesitancy

## Study

Multicentre • longitudinal • double-blind • add-on • randomized control trial

### Study interventions:

Placebo control\*

Video about infant soothing

Oral sucrose

Topical lidocaine

Infants randomly assigned to 1 of 4 levels of pain management for all vaccines at 2, 4, 6 and 12 months:

P

V

V

S

V

S

L

Group 1

Group 2

Group 3

Group 4

\*Double-dummy design: all parents watched a video (intervention or placebo), all infants received oral solution (sucrose or placebo) and topical cream (lidocaine or placebo); all infants received injection techniques to minimize pain.

## Results

- 352 infants participated in the study, from Jan. 17, 2012 to Feb. 2, 2016.
- Infant distress was assessed using the Modified Behavioural Pain Scale.
- The **scores were lower for the video-sucrose-lidocaine** group compared with the control ( $p < 0.001$ ), video ( $p = 0.003$ ), and video-sucrose ( $p = 0.005$ ) groups.
- The mean  $\pm$  standard deviation needle pain score was  $6.3 \pm 0.8$  in the video-sucrose-lidocaine group and  $6.7 \pm 0.8$  in each of the other groups.

## Interpretation

Only **liposomal lidocaine provided consistent analgesia** within additive pain intervention regimen during vaccination in infants.
